# Supplementary material
Source: PubMed Central journal article supplement (PMC3650531)
Supplement: JB.02037-12_zjb999092584so1.pdf [file JB.02037-12_zjb999092584so1.pdf]

1 **Supplementary Information for:**

2 **Archaeal DNA polymerase D but not DNA polymerase B is required for**  
3 **genome replication in *Thermococcus kodakarensis*.**

4 Lubomira Čuboňová, Tomas Richardson, Brett W. Burkhart, Zvi Kelman, Bernard  
5 A. Connolly, John N. Reeve, and Thomas J. Santangelo

6  
7 **Mutations in TK0664 that Resulted in 6MP<sup>R</sup>.** At minimum, one hundred  
8 independent cultures (3 ml) of *T. kodakarensis* KW128, TR1, TR2, TR3, TR4 and  
9 TS744 were grown in ASW-YT-S°, harvested, and dilutions plated on ASW-S°  
10 medium containing 100 μM 6MP plus all 20 amino acids. Cells from only two  
11 isolated colonies from each plate were used to inoculate cultures from which  
12 genomic DNA was isolated. Amplicons containing the TK0664 locus were  
13 generated and sequenced. The unique mutations identified in all strains are  
14 listed in Table S1 and their positions are shown in Figure S1. The presence or  
15 absence of Pol B had no statistically significant effect on the frequency or profile  
16 of the mutations that resulted in 6MP<sup>R</sup> although deletions and insertions >3 bp  
17 occurred more frequently in *T. kodakarensis* TS744 that lacked Pol B. The  
18 mutation profiles revealed a very strong strand-bias for C to T transitions. In 79  
19 of 80 mutations, the C to T transition occurred where C was in the template (non-  
20 coding) strand. Strand-biased DNA repair is known to occur in Bacteria and  
21 Eukaryotes when DNA damage is recognized by a transcribing RNA polymerase  
22 (1). Transcription stops and the stalled complex serves as a beacon for DNA  
23 repair but the repair occurs predominately on the template strand. The biased

24 profile of C to T transitions is not therefore likely to be a consequence of  
25 transcription-coupled repair, and it has been reported that transcription coupled  
26 DNA repair does not occur in Archaea (2, 3).

27

28 **Complete deletion of TK0001.** pBWB1 (Fig. S2) was constructed and  
29 transformed into *T. kodakarensis* strain KW128, and from the many colonies  
30 recovered, two strains (hereafter TS745-1 and TS745-2) resultant from confirmed  
31 double homologous recombination of pBWB1 into the genome of KW128 were  
32 retained. Colonies were recovered at the standard frequency, and two  
33 independently isolated strains, predicted to be genotypically identical, were  
34 phenotypically characterized (Fig. S2). A series of diagnostic PCRs (Fig. S2,  
35 panels C, D, and E) and Southern blots (Fig. S2, panel F) demonstrate the  
36 complete loss of the entire TK0001 open reading frame from the chromosome,  
37 as well as the integration of TK0254 as expected.

38 TS745-1 and TS745-2 behaved identically to each other as well as to  
39 strains TS742 and TS744 with respect of growth in liquid culture (Fig. S3) and on  
40 solidified media, response to UV light, and MMS and mitomycin C treatments.  
41 The full deletion of TK0001 is thus phenotypically identical, as predicted, to a  
42 partial deletion of TK0001 (strain TS744) and a strain containing a stop codon  
43 within TK0001 (strain TS742).

44

45 References for Supplementary Information

46 1- Hanawalt PC, Spivak G (2008) Transcription-coupled DNA repair: two  
 47 decades of progress and surprises. *Nat Rev Mol Cell Biol* 9:958-970  
 48 2- Dorazi R, Gotz D, Munro S, Bernander R, White MF (2007) Equal rates of  
 49 repair of DNA photoproducts in transcribed and non-transcribed strands in  
 50 *Sulfolobus solfataricus*. *Mol Microbiol* 63:521-529  
 51 3- Romano V, Napoli A, Salerno V, Valenti A, Rossi M, Ciaramella M (2006) Lack  
 52 of strand-specific repair of UV-induced DNA lesions in three genes of the  
 53 archaeon *Sulfolobus solfataricus*. *J Mol Biol* 365:921-929.

54

55

56 Table S1. **Spontaneous mutations in TK0664 that resulted in 6MP<sup>R</sup>**

| Strain | <sup>a</sup> Unique mutations | <sup>b</sup> Single bp substitutions | <sup>c</sup> A→T<br>T→A | <sup>c</sup> A→C<br>T→G | <sup>c</sup> A→G<br>T→C | <sup>c</sup> G→A<br>C→T | <sup>c</sup> G→C<br>C→G | <sup>c</sup> G→T<br>C→A | <sup>d</sup> Del+Ins | <sup>e</sup> Del+Ins > 3bp |
|--------|-------------------------------|--------------------------------------|-------------------------|-------------------------|-------------------------|-------------------------|-------------------------|-------------------------|----------------------|----------------------------|
| TR1    | 93                            | 41 (44%)                             | 0                       | 3 (3%)                  | 12 (13%)                | 20 (22%)                | 0                       | 6 (6%)                  | 52 (56%)             | 6 (6%)                     |
| TR2    | 90                            | 42 (47%)                             | 1 (1%)                  | 1 (1%)                  | 11 (12%)                | 23 (26%)                | 1 (1%)                  | 5 (6%)                  | 48 (53%)             | 1 (1%)                     |
| TR3    | 64                            | 37 (58%)                             | 1 (2%)                  | 6 (9%)                  | 4 (6%)                  | 18 (28%)                | 0                       | 5 (8%)                  | 30 (47%)             | 3 (5%)                     |
| TR4    | 64                            | 35 (55%)                             | 4 (6%)                  | 3 (5%)                  | 1 (2%)                  | 18 (28%)                | 0                       | 4 (7%)                  | 29 (45%)             | 0                          |
| TS744  | 51                            | 8 (16%)                              | 1 (2%)                  | 1 (2%)                  | 0                       | 5 (10%)                 | 0                       | 1 (2%)                  | 43 (84%)             | 17 (33%)                   |

57 Footnotes:

58 <sup>a</sup> The number of unique mutations sequenced in spontaneously 6MP<sup>R</sup> clones  
 59 isolated from that *T. kodakarensis* strain.

60 <sup>b</sup> The number and percentage of the unique mutations that were single base pair  
 61 substitutions.

62 <sup>c</sup> The nature of single base pair substitutions. The paired changes are  
 63 indistinguishable (e.g. an A to T change in one strand cannot be differentiated from a T

64 to A change at the same position on the opposite strand).

65 <sup>d</sup> The number and percentage of the unique mutations that were deletions or  
66 insertions.

67 <sup>e</sup> The number and percentage of the unique mutations that were deletions or  
68 insertions longer than 3 bp.

69

70

### Supplementary Figure legend

71

72 **Fig. S1.** Nucleotide and amino acid substitutions in TK0664 that resulted in  
73 6MP<sup>R</sup>. The nucleotide and amino acid sequence encoded by TK0664 are shown  
74 with the mutations identified in 6MP<sup>R</sup> isolates indicated above and the resulting  
75 amino acid substitutions indicated below the sequence. Asterisks identify the  
76 positions of nonsense mutations. A region within the TK0664 encoded protein  
77 conforms to the consensus for the active site of phosphoribosyltransferases  
78 (PRT). This is shown at the bottom of the figure with the missense and in-frame  
79 deletions that occurred within this motif highlighted. Two mutations that did not  
80 change the TK0664 coding sequence changed the sequence of the presumed  
81 promoter, and one changed the sequence of the presumed ribosome binding site  
82 (not shown).

83

84 **Fig. S2.** Deletion of the entire TK0001 open reading frame. A) Plasmid pBWB1  
85 was designed to integrate into the KW128 chromosome and restore tryptophan  
86 prototrophy while deleting TK0001. B) The entirety of TK0001 was removed in  
87 strain TS745. The locations of primers (shown as black arrows, labeled I-X) and

88 PvuII restriction sites (shown as P) are indicated. C, D, and E) Diagnostic PCR  
89 amplifications with the primer pairs shown use genomic DNA isolated from the  
90 indicated strains as templates confirm the genomic architecture of strains  
91 KW128, and TS745-1 and TS745-2. M = DNA size markers; length in base pairs  
92 is indicated. F) Southern blots of PvuII digested total genomic DNA from the  
93 indicated strains confirms the loss of TK0001 from strains TS745-1 and TS745-2.  
94 An additional PvuII site is located immediately upstream of the TK0254  
95 sequence. DIG-labeled probes were generated with the primer pairs shown  
96 above each blot.

97

98 **Fig. S3.** Deletion of TK0001 does not affect growth. Average values for the  
99 growth of three or more cultures of *T. kodakarensis* KW128 (□), TS745-1 (Δ), and  
100 TS745-2 (O) in ASW-YT-S° medium at 85°C are shown, with errors and with  
101 moving averages provided as trend lines.
