# Supplementary material
Source: PubMed Central journal article supplement (PMC3650531)
Supplement: JB.02037-12_zjb999092584so2.pdf [file JB.02037-12_zjb999092584so2.pdf]

```

A          AA          AA
ATGAAGAAGTTTCCTGCAAGGCTCGCTTCTTGGGAAGACATTGAAAGGTGGGCGAAGGAA 20
M K K F P A R L A S W E D I E R W A K E
I          A          TG T          C *
GGCGCCTGGAAGATTCTGGAAGAAGGCTGGAAGCCAGATGTGGTGGTTGGTCTCGCCAGG 40
G A W K I L E E G W K P D V V V G L A R
T          *          G *          C
A TA A          *          G C*AT          T          G
GGCGGCTGGGTTCGCGGCGAGACTCTACTGCGACTACCTGGGAATCAAAGACCTTGTAAGC 60
G G W V A A R L Y C D Y L G I K D L V S
D D *          R Y          *          R
V C          T          AA          T          T          A
CTCAAGGTGGAGCACTGGGGAGTAACCGCTACTCCGGACGGCAAGGCCAAGCTCAAGTAC 80
L K V E H W G V T A T P D G K A K L K Y
          *          *          *          *          *
          A          A C          A T A
GGCACGAAC TACGACCTCAGCGGAAAAAGGTTCTCATCGTCGACGACATCAGCGATACT 100
G T N Y D L S G K K V L I V D D I S D T
          *          E Q          Y          N          I          N
          T
GGTGAGAGCCTGACGCTGGCCAAAAC TACGTGAGAGCAAGAGCCCTGCGGAAGTCAGG 120
G E S L T L A K N Y V E S K S P A E V R
          *
          T          A          T
ACTGCAACACTCCTGACGATCAGAGGCTCCCGCTTCAAGCCGAGTACTACGAGAGGAG 140
T A T L L T I R G S R F K P E Y Y G E E
          *          *          *
          G          A          A          G
ATAGACTGGGCCTGGATAGTCTTCCCGTGGAACTTCGTCGAGGATATGATAAACCTCGTG 160
I D W A W I V F P W N F V E D M I N L V
          *          R          *          K          G
          G
AGCAACATTCTTGAGGAAAAAGGAAGCGGTAAGCACCGACGAGATAATCGAGCTCTTCAAG 180
S N I L E E K E A V S T D E I I E L F K
          *
GAGCTCCACGGTCTCGAAGTCCCGAAGGGCAAGCTCGAAGAGGCCCTCAGGATGGCTGAA 200
E L H G L E V P K G K L E E A L R M A E
          *
ATGAGGAAGGTTTTTAAGTT CAGGGAAGGGAAGTGGCTCAAAGCCTGA
M R K V F K F R E G K W L K A * 215

```

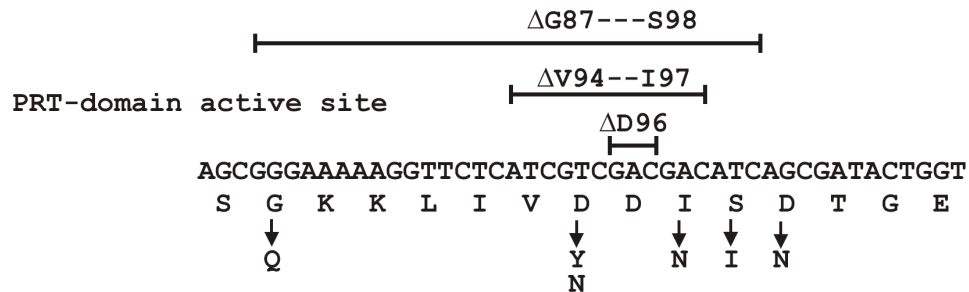

Figure S1
