# Supplementary material
Source: PubMed Central journal article supplement (PMC3650531)

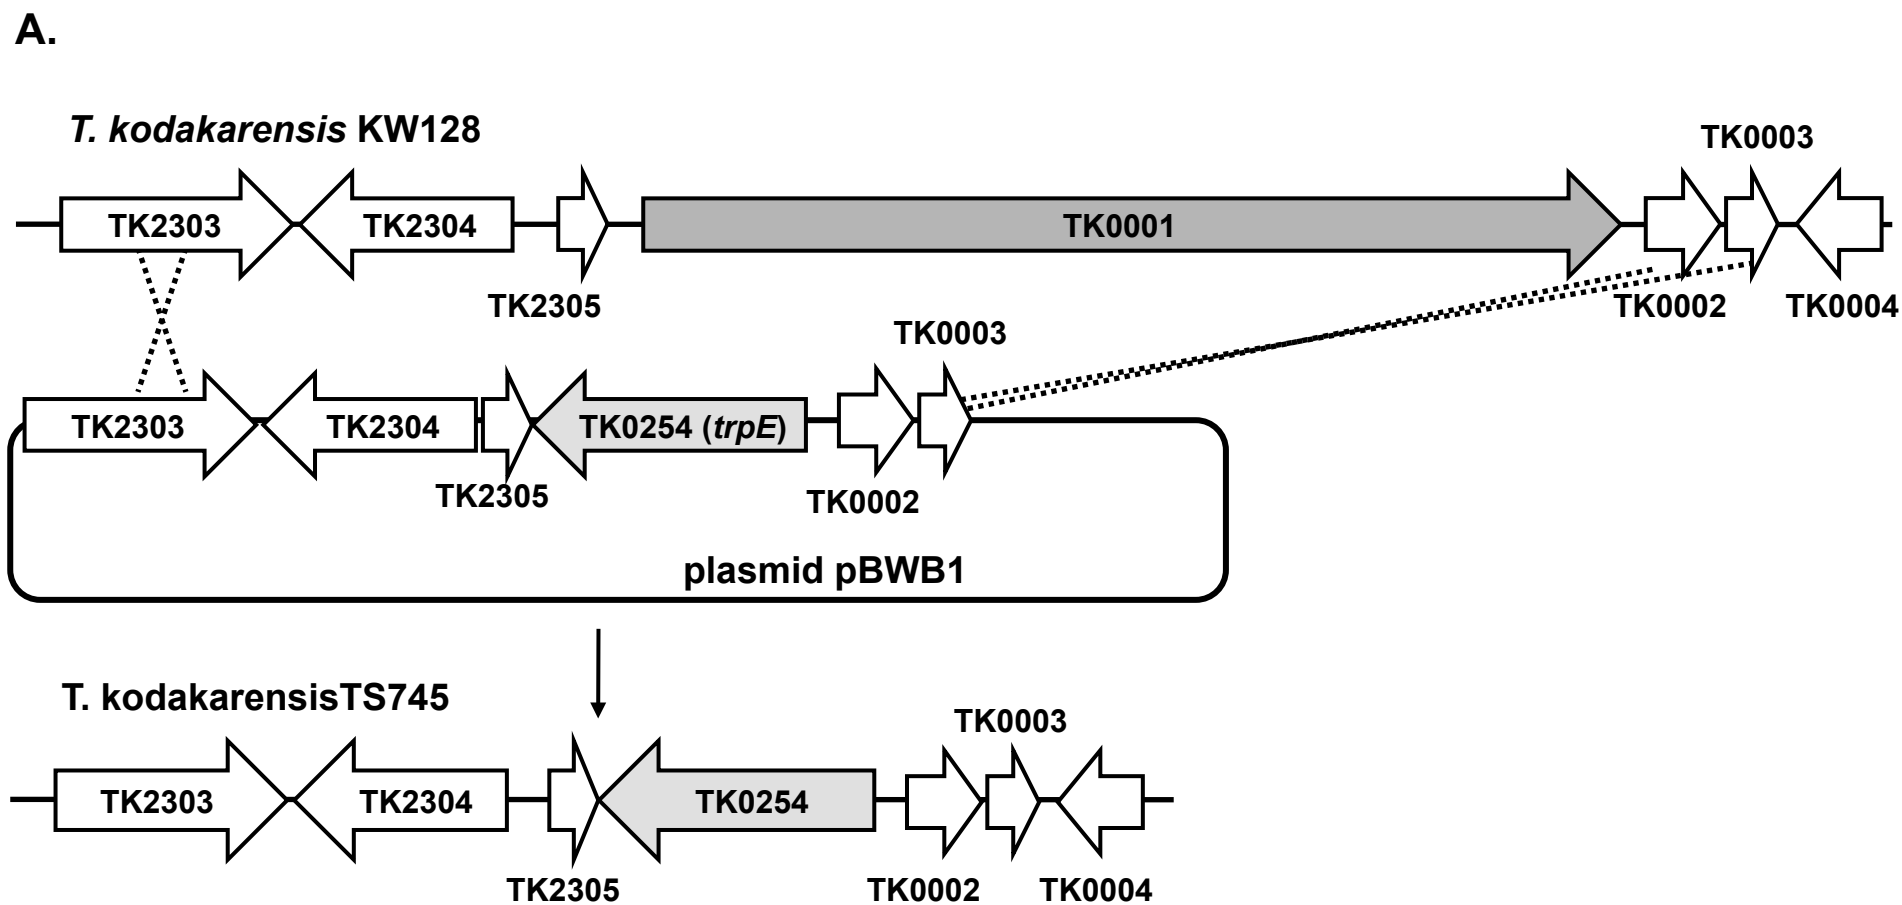

**Figure S2**

Supplement: JB.02037-12_zjb999092584so3.pdf [file JB.02037-12_zjb999092584so3.pdf]

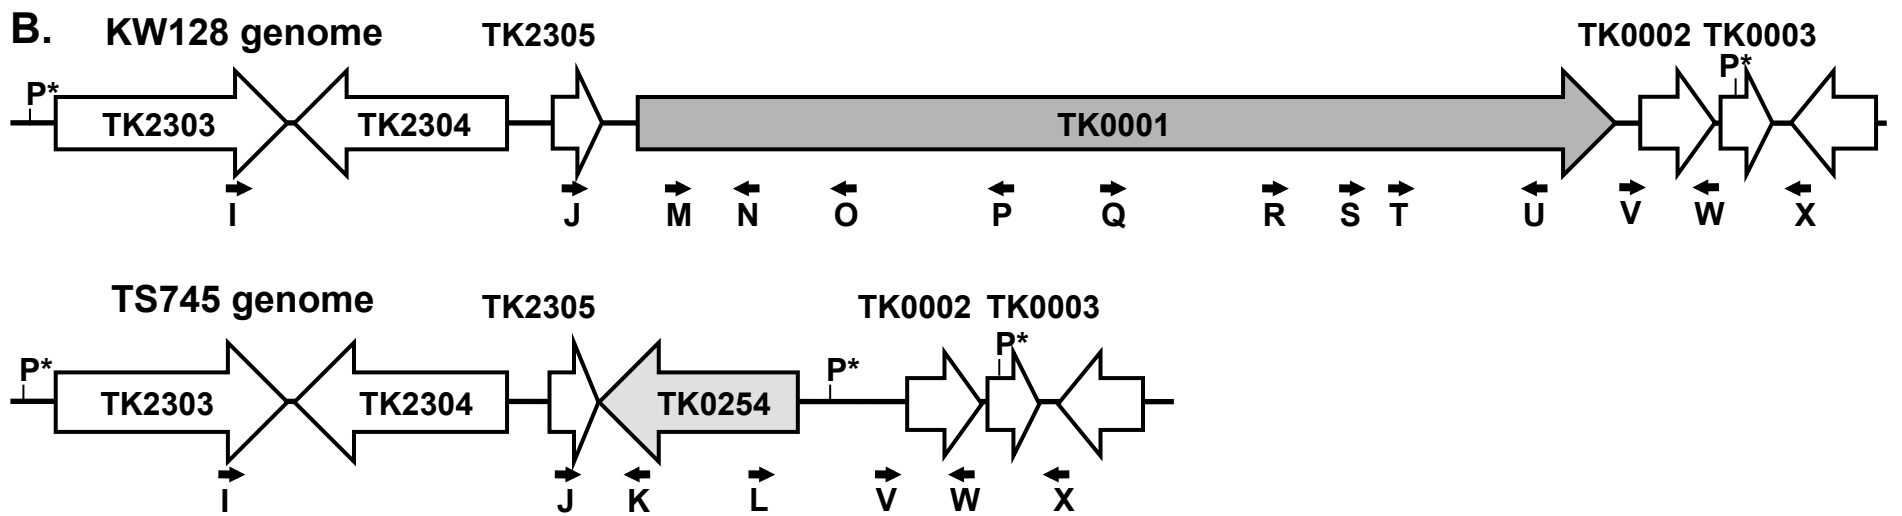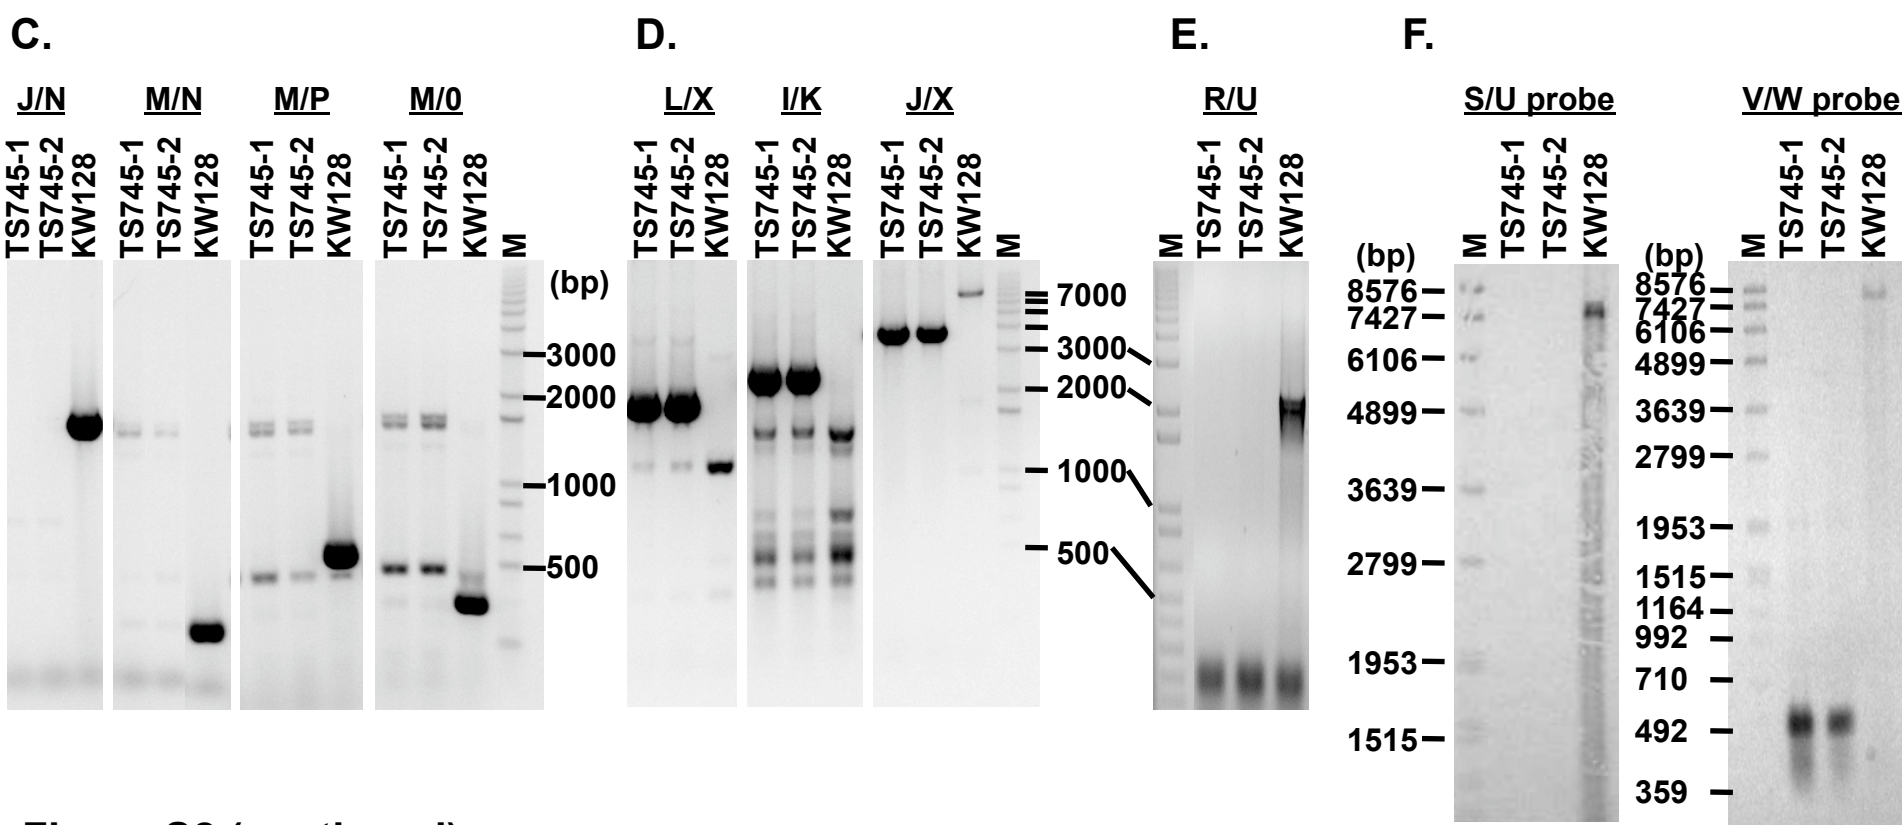

Figure S2 (continued)

Supplement: JB.02037-12_zjb999092584so4.pdf [file JB.02037-12_zjb999092584so4.pdf]

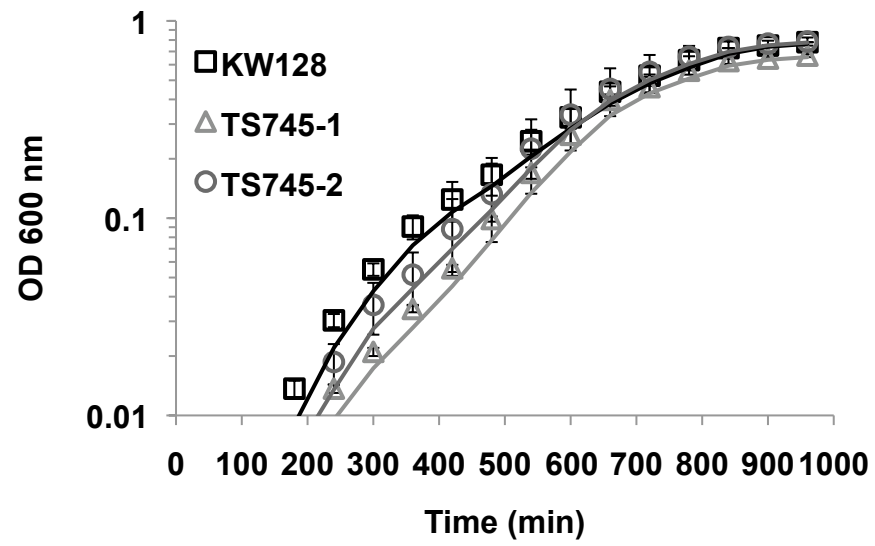

Figure S3

Supplement: JB.02037-12_zjb999092584so5.pdf [file JB.02037-12_zjb999092584so5.pdf]
